# Supplementary material for: Ti2PTe2 monolayer: a promising two-dimensional anode material for sodium-ion batteries
Source: Royal Society of Chemistry journal article supplement (doi:10.1039/c9ra01686d), 2019-01-01
Supplement: c9ra01686d1.pdf [file c9ra01686d1.pdf]

## Electronic Supplementary Information

### **Ti<sub>2</sub>PTe<sub>2</sub> Monolayer: A Promising Two-Dimensional Anode Material for Sodium-Ion Batteries**

Jie Liu,<sup>†</sup> Man Qiao,<sup>†</sup> Xiaorong Zhu,<sup>†</sup> Yu Jing,<sup>‡,§\*</sup> Yafei Li<sup>†\*</sup>

<sup>†</sup>Jiangsu Key Laboratory of New Power Batteries, Jiangsu Collaborative Innovation Centre of Biomedical Functional Materials, School of Chemistry and Materials Science, Nanjing Normal University, Nanjing 210023, China

<sup>‡</sup>College of Chemical Engineering, Nanjing Forestry University, Nanjing 210037, China

<sup>§</sup>Jiangsu Co-Innovation Centre of Efficient Processing and Utilization of Forest Resources, Nanjing 210037, China

To whom correspondence should be addressed. Email: [yujing@njfu.edu.cn](mailto:yujing@njfu.edu.cn) (YJ) and [liyafei@njnu.edu.cn](mailto:liyafei@njnu.edu.cn) (YL)

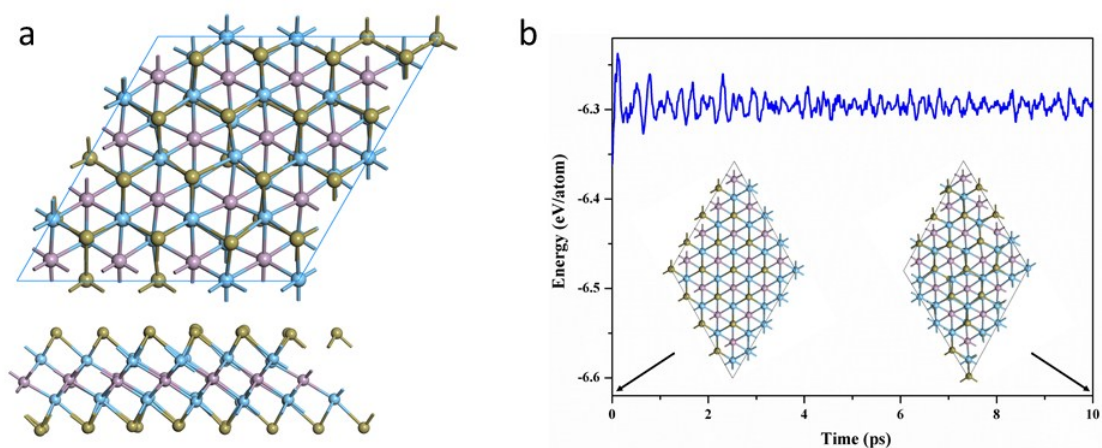

**Fig. S1** (a) Snapshots of the equilibrium structures of Ti<sub>2</sub>PTe<sub>2</sub> monolayer at the end of a 10 ps ab initio molecular dynamic (AIMD) simulation at the temperature of 500 K. (b) The evolution of the total energy of AIMD simulations.

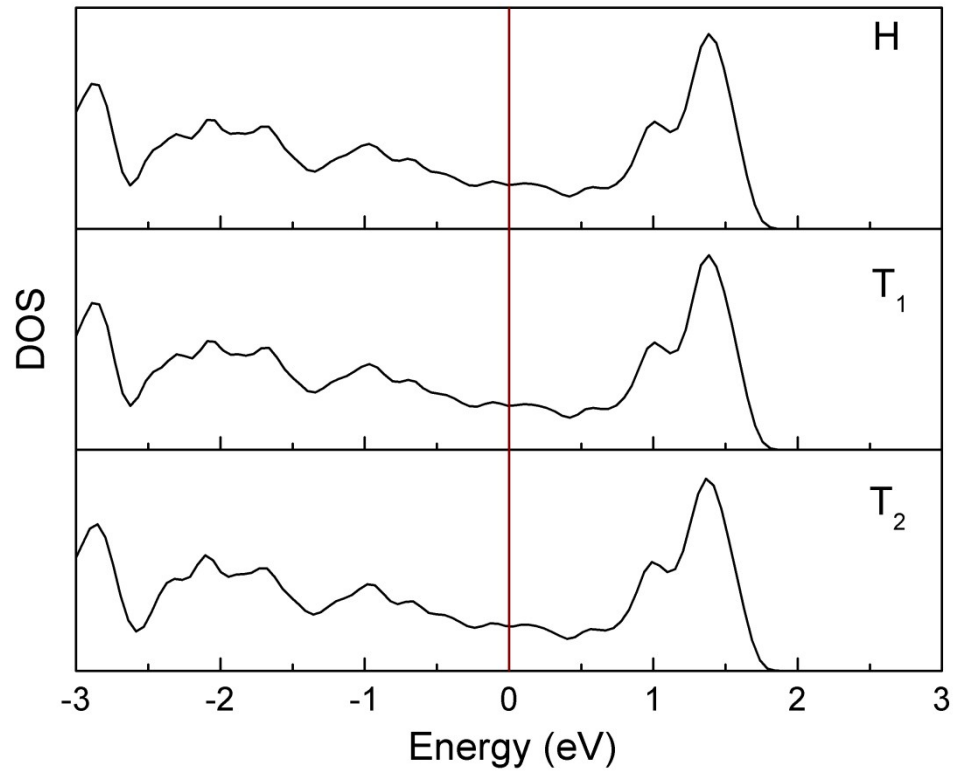

**Fig. S2** Electric density of states (DOS) of  $\text{Ti}_2\text{PTe}_2$  monolayer after Na adsorption.

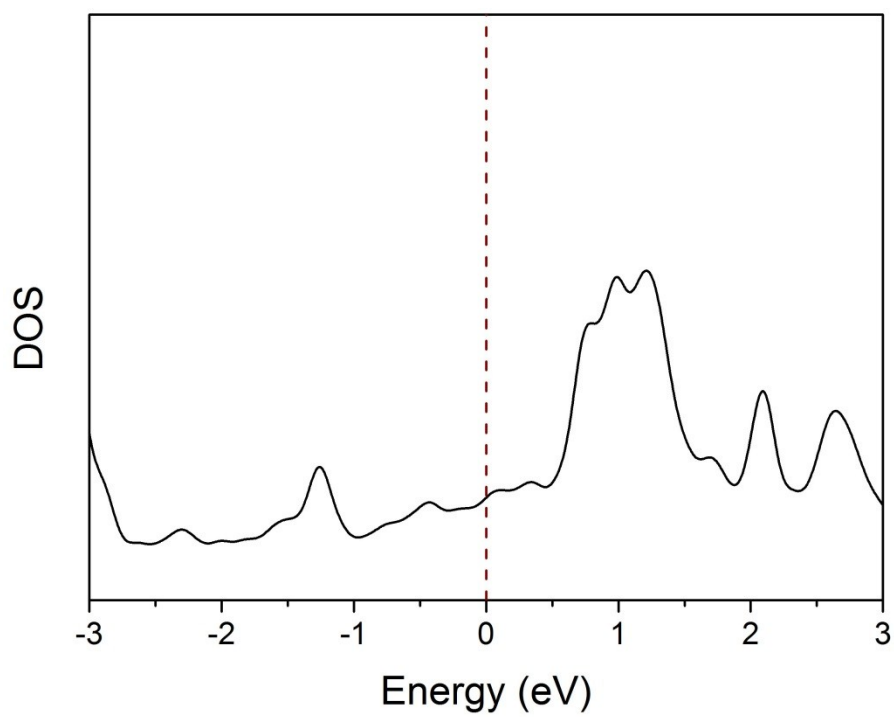

**Fig. S3** Electric density of states (DOS) of  $\text{Ti}_2\text{PTe}_2$  monolayer after adding two Na layers on both sides.
